# Supplementary material
Source: publisher figshare collection journal article supplement (https://karger.figshare.com/articles/dataset/_/5122843)
Supplement: Supplementary file 1 [file 1]

Archive with 3 entries (3 files):
- 000331776_sm_Table_A.pdf
- 000331776_sm_Table_B.pdf
- 000331776_sm_Table_C.pdf
