# Supplementary material
Source: publisher figshare collection journal article supplement (https://karger.figshare.com/articles/dataset/_/5122843)
Supplement: Supplementary file 1 [file 1 › 000331776_sm_Table_A.pdf]

## Online Supplemental Table

Table A

Factor structure of the questionnaires DS 14, Mini-Spin, GAD-2 and PHQ-9 separately for participants without and with CHD

| Factor                                   | Content                                                                                                                                 | Number of Items | Eigenvalues | Variance (%) | Interpretation             |
|------------------------------------------|-----------------------------------------------------------------------------------------------------------------------------------------|-----------------|-------------|--------------|----------------------------|
| <b>Participants without CHD (N=4707)</b> |                                                                                                                                         |                 |             |              |                            |
| 1                                        | 9 of 9 Depression Items<br>2 of 2 Generalized anxiety disorder Items<br>1 of 7 Negative affectivity items                               | 12              | 8.6         | 30.7         | Distress                   |
| 2                                        | 7 of 7 Social inhibition items                                                                                                          | 7               | 3.1         | 11.1         | Social inhibition          |
| 3                                        | 6 of 7 Negative Affectivity Items                                                                                                       | 6               | 1.6         | 5.7          | Negative affectivity       |
| 4                                        | 3 of 3 Social Phobia Items                                                                                                              | 3               | 1.2         | 4.2          | Social phobia              |
| <b>Participants with CHD (N=226)</b>     |                                                                                                                                         |                 |             |              |                            |
| 1                                        | 8 of 9 Depression Items<br>2 of 2 Generalized Anxiety Disorder Items<br>3 of 3 Social Phobia Items<br>1 of 7 Negative affectivity items | 14              | 9.6         | 34.2         | Distress and social phobia |
| 2                                        | 7 of 7 Social Inhibition Items                                                                                                          | 7               | 2.7         | 9.6          | Social inhibition          |
| 3                                        | 6 of 7 Negative Affectivity Items<br>1 of 9 depression items                                                                            | 7               | 1.8         | 6.3          | Negative affectivity       |

The separateness of the scales was examined by means of a principal component analysis (PCA) on the items of the DS14 (14 items), Mini-Spin (3 items), GAD-2 (2 items) and PHQ-9 (9 items). These pooled 28 items were submitted to factor analysis, separately for subjects with and without CHD (see supplementary online material, Table A). In both samples distinctness of the scales was confirmed. According to the Screeplot, four factors were identified for the sample without CHD (explaining 51.7% of the variance) and three factors for the CHD sample (50.1% of the variance explained). In the sample without CHD, factor 1 ("distress") included all depression, anxiety and one negative affectivity item (highest loading: "feeling tired or having little energy"). Factor 2 "social inhibition" (highest negative loading "I make contact easily when I meet people") included all 7 SI items. Factor 3 included six out of seven "negative affectivity" items ("I am often irritated"); factor 4 measured social phobia including the items of the Mini Spin (highest loading "to be embarrassed or to appear to be stupid belongs to my worst fears"). In the sample of the participants with CHD the PCA

yielded a three factor solution, as “social phobia” loaded on “distress”, together with depression, anxiety items and the single negative affectivity item. Again, “social inhibition” and “negative affectivity” emerged as separate factors.
