# Supplementary material
Source: publisher figshare collection journal article supplement (https://karger.figshare.com/articles/dataset/_/5122843)
Supplement: Supplementary file 1 [file 1 › 000331776_sm_Table_B.pdf]

Online Supplemental Table

Table B

Association of Type D with mental health care consumption adjusted for features of other mental disorders and sociodemographic characteristics\*

|                                            | Visit of a psychiatrist or psychotherapist<br>during the last 4 Weeks <sup>1)</sup> |            | OR (95% CI)               | p             |
|--------------------------------------------|-------------------------------------------------------------------------------------|------------|---------------------------|---------------|
|                                            | no (N=2175)                                                                         | yes (N=60) |                           |               |
| Gender, (women vs. men), % (N)             | 52.7 (1147)                                                                         | 56.7 (34)  | 1.12 (0.61 - 2.06)        | 0.72          |
| Age, (per 10 years increase in age)        |                                                                                     |            | 0.82 (0.61 - 1.11)        | 0.20          |
| 35 - 44 years of age                       | 15.8 (344)                                                                          | 23.3 (14)  |                           |               |
| 45 - 54 years of age                       | 23.6 (514)                                                                          | 40.0 (24)  |                           |               |
| 55 - 64 years of age                       | 28.7 (625)                                                                          | 23.3 (14)  |                           |               |
| 65 - 74 years of age                       | 31.8 (692)                                                                          | 13.3 (8)   |                           |               |
| <b>Socioeconomic status (3-27)</b>         | 11.9 ± 4.4                                                                          | 13.2 ± 3.9 | <b>1.09 (1.02 - 1.18)</b> | <b>0.014</b>  |
| <b>Type D personality<sup>2)</sup></b>     | 21.9 (467)                                                                          | 57.6 (34)  | <b>2.56 (1.31 - 5.02)</b> | <b>0.0062</b> |
| <b>Depression<sup>2)</sup></b>             | 8.5 (183)                                                                           | 45.8 (27)  | <b>3.15 (1.38 - 7.17)</b> | <b>0.0064</b> |
| Generalized anxiety disorder <sup>2)</sup> | 7.1 (151)                                                                           | 37.3 (22)  | 1.43 (0.60 - 3.40)        | 0.42          |
| Depersonalisation <sup>2)</sup>            | 1.1 (24)                                                                            | 1.7 (1)    | 1.68 (0.75 - 3.74)        | 0.21          |
| <b>Social Phobia<sup>2)</sup></b>          | 7.1 (151)                                                                           | 33.9 (20)  | <b>2.20 (1.05 - 4.61)</b> | <b>0.036</b>  |
| Panic disorder <sup>2)</sup>               | 5.7 (117)                                                                           | 25.9 (14)  | 1.66 (0.75 - 3.67)        | 0.21          |

\* Multivariable logistic regression model

1) Psychotherapeutic or psychiatric treatment was defined as the visit of a psychiatrist or psychotherapist during the last 4 weeks. 98.5% (1669) without Type-D and 93.2% (467) with Type-D did not consult any psychiatrist or psychotherapist during the last 4 weeks.

2) Presence versus absence of the condition
