# Supplementary material
Source: publisher figshare collection journal article supplement (https://karger.figshare.com/articles/dataset/_/5122843)
Supplement: Supplementary file 1 [file 1 › 000331776_sm_Table_C.pdf]

Online Supplemental Table

Table C

Association of Type D with biomarkers of inflammation, coagulation and myocardium

|                                       | Non Type D<br>N=3833   | Type D<br>N=1095       | OR (95% CI)*          | p    |
|---------------------------------------|------------------------|------------------------|-----------------------|------|
| <b>Inflammation</b> <sup>1)2)3)</sup> |                        |                        |                       |      |
| CRP                                   | 1.60 (0.50 / 3.10)     | 1.60 (0.50 / 3.20)     | 1.02 (0.94 - 1.11)**  | 0.64 |
| IL-18                                 | 227.8 (181.8 / 289.9)  | 219.8 (174.9 / 292.7)  | 0.88 (0.70 - 1.11)**  | 0.29 |
| IL-1-ra                               | 316.0 (237.4 / 417.3)  | 319.6 (234.1 / 444.4)  | 1.13 (0.96 - 1.34)**  | 0.15 |
| Albumin                               | 43.2 ± 3.1             | 43.2 ± 3.3             | 0.99 (0.97 - 1.02)    | 0.60 |
| White blood cell count                | 6.8 (5.8 / 8.2)        | 6.8 (5.8 / 8.1)        | 1.00 (0.75 - 1.32)**  | 0.98 |
| <b>Coagulation</b>                    |                        |                        |                       |      |
| Fibrinogen                            | 346.0 (304.0 / 400.0)  | 345.0 (301.0 / 401.0)  | 1.08 (0.77 - 1.50) ** | 0.67 |
| <b>Myocardium</b>                     |                        |                        |                       |      |
| Troponin I                            | 0.005 (0.003 / 0.008)  | 0.005 (0.003 / 0.008)  | 1.02 (0.97 - 1.07)**  | 0.37 |
| Troponin I ≥ 0.04 ng/ml, % (N)        | 1.0 (39)               | 0.7 (7)                | 0.72 (0.32 - 1.61)    | 0.42 |
| NT-proBNP                             | 63.10 (29.22 / 124.90) | 57.68 (24.93 / 115.80) | 0.98 (0.92 - 1.04)**  | 0.46 |

\*Odds ratios are adjusted for age and sex

1) Data presented are mean ± standard deviation and median (25<sup>th</sup> / 75<sup>th</sup>) percentile.

2) Subjects with a self reported influenza infection, common cold or other inflammatory diseases during the last week before examination are excluded

3) For the logistic regression models biomarkers were log transformed
